# Supplementary material for: Synthesis, physico-chemical characterization and structure of the elusive hydroxylammonium lead iodide perovskite NH3OHPbI3
Source: Royal Society of Chemistry journal article supplement (doi:10.1039/c9dt00690g), 2019-01-01
Supplement: c9dt00690g1.pdf [file c9dt00690g1.pdf]

## Supporting Information

### **Synthesis, Physico-Chemical Characterization and Structure of the Elusive Hydroxylammonium Lead Iodide Perovskite $\text{NH}_3\text{OHPbI}_3$**

Andrea D'Annibale<sup>1</sup>, Riccardo Panetta<sup>1</sup>, Ombretta Tarquini<sup>2</sup>, Marcello Colapietro<sup>2</sup>, Simone Quaranta<sup>3</sup>, Alberto Cassetta<sup>4</sup>, Luisa Barba<sup>4</sup>, Giuseppe Chita<sup>4</sup>, Alessandro Latini<sup>1\*</sup>

<sup>1</sup> Dipartimento di Chimica, Università degli Studi di Roma "La Sapienza", Piazzale Aldo Moro 5, 00185 Roma, Italy

<sup>2</sup> Consiglio Nazionale delle Ricerche - Istituto di Cristallografia, Via Salaria km 29,300, 00015 Monterotondo Scalo, Roma, Italy

<sup>3</sup> Dipartimento di Ingegneria dell'Informazione, Elettronica e Telecomunicazioni, Università degli Studi di Roma "La Sapienza", Via Eudossiana, 18, 00184 Roma, Italy

<sup>4</sup> Consiglio Nazionale delle Ricerche - Istituto di Cristallografia, Sede Secondaria di Trieste, Area Science Park – Basovizza, Strada Statale 14, km 163.5, 34149 Trieste, Italy

\*corresponding author. Email: [alessandro.latini@uniroma1.it](mailto:alessandro.latini@uniroma1.it)

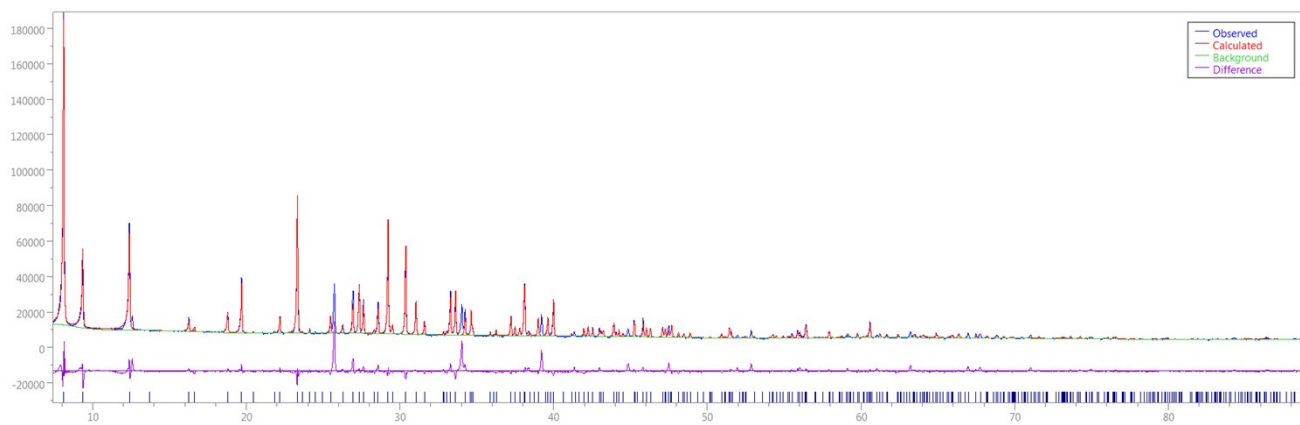

Fig. S1. Le Bail fit of the X-ray powder diffraction pattern of  $\text{NH}_3\text{OHPbI}_3$  powder prepared by sulfolane extraction with toluene. The peaks that were not fitted are attributed to  $\text{PbI}_2$  impurity.

## Bond lengths

|                                         |             |                           |             |
|-----------------------------------------|-------------|---------------------------|-------------|
| Pb1—I2                                  | 3.2060 (7)  | C1—H1AB                   | 0.9900      |
| Pb1—I2 <sup>i</sup>                     | 3.2060 (7)  | C1—H1AA                   | 0.9900      |
| Pb1—I3                                  | 3.2160 (5)  | C1—C2AB                   | 1.53 (2)    |
| Pb1—I3 <sup>i</sup>                     | 3.2159 (5)  | C1—C2AA                   | 1.53 (2)    |
| Pb1—I3 <sup>ii</sup>                    | 3.2159 (5)  | C2AB—H2AA                 | 0.9900      |
| Pb1—I3 <sup>iii</sup>                   | 3.2159 (5)  | C2AB—H2AB                 | 0.9900      |
| S4—O3                                   | 1.33 (2)    | C2AA—H2AC                 | 0.9900      |
| S4—O3 <sup>iv</sup>                     | 1.33 (2)    | C2AA—H2AD                 | 0.9900      |
| S4—C2AB                                 | 1.878 (15)  | O2—H2                     | 0.8401      |
| S4—C2AA                                 | 1.881 (15)  | O2—N3                     | 1.4151 (10) |
| C1—C1 <sup>iv</sup>                     | 1.52 (2)    | N3—H3A                    | 0.9099      |
| C1—H1BD                                 | 0.9900      | N3—H3B                    | 0.9100      |
| C1—H1BC                                 | 0.9900      | N3—H3C                    | 0.9101      |
| Bond angles                             |             |                           |             |
| I2—Pb1—I2 <sup>i</sup>                  | 180.0       | C1 <sup>iv</sup> —C1—C2AA | 118.0 (8)   |
| I2 <sup>i</sup> —Pb1—I3 <sup>iii</sup>  | 93.005 (13) | H1BD—C1—H1BC              | 108.0       |
| I2 <sup>i</sup> —Pb1—I3 <sup>i</sup>    | 86.995 (13) | H1AB—C1—H1AA              | 107.1       |
| I2—Pb1—I3 <sup>ii</sup>                 | 93.005 (13) | C2AB—C1—H1BD              | 109.4       |
| I2—Pb1—I3 <sup>i</sup>                  | 93.005 (13) | C2AB—C1—H1BC              | 109.4       |
| I2 <sup>i</sup> —Pb1—I3 <sup>ii</sup>   | 86.995 (13) | C2AA—C1—H1AB              | 107.8       |
| I2—Pb1—I3                               | 86.995 (13) | C2AA—C1—H1AA              | 107.8       |
| I2—Pb1—I3 <sup>iii</sup>                | 86.995 (13) | S4—C2AB—H2AA              | 112.1       |
| I2 <sup>i</sup> —Pb1—I3                 | 93.005 (13) | S4—C2AB—H2AB              | 112.1       |
| I3 <sup>iii</sup> —Pb1—I3 <sup>i</sup>  | 96.06 (2)   | C1—C2AB—S4                | 98.3 (10)   |
| I3 <sup>i</sup> —Pb1—I3                 | 180.0       | C1—C2AB—H2AA              | 112.1       |
| I3 <sup>iii</sup> —Pb1—I3               | 83.94 (2)   | C1—C2AB—H2AB              | 112.1       |
| I3 <sup>ii</sup> —Pb1—I3 <sup>iii</sup> | 180.00 (2)  | H2AA—C2AB—H2AB            | 109.8       |
| I3 <sup>ii</sup> —Pb1—I3 <sup>i</sup>   | 83.94 (2)   | S4—C2AA—H2AC              | 112.1       |
| I3 <sup>ii</sup> —Pb1—I3                | 96.06 (2)   | S4—C2AA—H2AD              | 112.1       |
| Pb1 <sup>iii</sup> —I2—Pb1              | 76.281 (19) | C1—C2AA—S4                | 98.1 (10)   |
| Pb1 <sup>iii</sup> —I3—Pb1              | 76.003 (14) | C1—C2AA—H2AC              | 112.1       |
| O3—S4—O3 <sup>iv</sup>                  | 102 (3)     | C1—C2AA—H2AD              | 112.1       |
| O3—S4—C2AB                              | 130.9 (12)  | H2AC—C2AA—H2AD            | 109.8       |
| O3 <sup>iv</sup> —S4—C2AB               | 98.3 (12)   | N3—O2—H2                  | 107.4       |
| O3—S4—C2AA                              | 107.1 (12)  | O2—N3—H3A                 | 104.9       |

|                              |            |                              |             |
|------------------------------|------------|------------------------------|-------------|
| O3 <sup>iv</sup> —S4—C2AA    | 118.1 (12) | O2—N3—H3B                    | 102.7       |
| C1 <sup>iv</sup> —C1—H1BD    | 109.4      | O2—N3—H3C                    | 120.3       |
| C1 <sup>iv</sup> —C1—H1BC    | 109.4      | H3A—N3—H3B                   | 109.5       |
| C1 <sup>iv</sup> —C1—H1AB    | 107.8      | H3A—N3—H3C                   | 109.5       |
| C1 <sup>iv</sup> —C1—H1AA    | 107.8      | H3B—N3—H3C                   | 109.4       |
| C1 <sup>iv</sup> —C1—C2AB    | 111.3 (10) |                              |             |
| C1 <sup>iv</sup> —C1—C2AB—S4 | -35.2 (18) | O3 <sup>iv</sup> —S4—C2AB—C1 | 147.1 (17)  |
| C1 <sup>iv</sup> —C1—C2AA—S4 | 12 (2)     | O3—S4—C2AA—C1                | -130.7 (18) |
| O3—S4—C2AB—C1                | -100 (2)   | O3 <sup>iv</sup> —S4—C2AA—C1 | 115.5 (18)  |

Table S1. Geometrical parameters (bond lengths and angles) of the structure. Bond lengths and angles are reported in Ångstroms and degrees, respectively.
